# Supplementary material for: Amniotic Mesenchymal-Derived Extracellular Vesicles and Their Role in the Prevention of Persistent Post-Breeding Induced Endometritis
Source: MDPI journal article supplement (doi:10.3390/ijms24065166), 2023-03-08
Supplement: s1 [file s1]

## Supplementary Files

**Supplementary Table S1.** Sperm motility parameters evaluated by CASA System of sperm treated at different time with different concentration of EVs, compared to CTR.

| EV concentration<br>(x10 <sup>6</sup> )/ml | VCL (μm/s)    |                            |                            |                             |                            | VSL (μm/s)    |                            |                            |                            |                            |
|--------------------------------------------|---------------|----------------------------|----------------------------|-----------------------------|----------------------------|---------------|----------------------------|----------------------------|----------------------------|----------------------------|
|                                            | 0h            | 1h                         | 2h                         | 3h                          | 4h                         | 0h            | 1h                         | 2h                         | 3h                         | 4h                         |
| CTR                                        | 76.34 ± 70.15 | 64.25 ± 3.19 <sup>aA</sup> | 49.76 ± 4.21 <sup>aB</sup> | 49.05 ± 4.77 <sup>aB</sup>  | 49.50 ± 5.80 <sup>aB</sup> | 34.12 ± 39.47 | 29.31 ± 2.75 <sup>aA</sup> | 20.05 ± 1.66 <sup>aB</sup> | 20.57 ± 2.43 <sup>aB</sup> | 19.46 ± 1.32 <sup>aB</sup> |
| 50                                         |               | 64.89 ± 4.50 <sup>aA</sup> | 52.88 ± 5.35 <sup>aB</sup> | 49.74 ± 5.65 <sup>aC</sup>  | 47.02 ± 4.13 <sup>aC</sup> |               | 10.23 ± 1.08 <sup>bA</sup> | 25.44 ± 2.60 <sup>bB</sup> | 24.95 ± 2.02 <sup>bB</sup> | 19.02 ± 2.18 <sup>aC</sup> |
| 100                                        |               | 60.66 ± 6.54 <sup>aA</sup> | 52.15 ± 5.82 <sup>aB</sup> | 74.89 ± 7.02 <sup>bC</sup>  | 36.64 ± 3.45 <sup>bD</sup> |               | 26.14 ± 2.81 <sup>cA</sup> | 22.49 ± 2.58 <sup>aA</sup> | 35.18 ± 3.10 <sup>bB</sup> | 16.10 ± 1.63 <sup>bC</sup> |
| 150                                        |               | 56.36 ± 5.42 <sup>aA</sup> | 83.22 ± 7.19 <sup>bB</sup> | 101.95 ± 8.29 <sup>cC</sup> | 65.70 ± 6.74 <sup>bD</sup> |               | 18.74 ± 2.45 <sup>dA</sup> | 37.96 ± 3.69 <sup>bB</sup> | 36.28 ± 3.69 <sup>dB</sup> | 23.12 ± 2.52 <sup>cA</sup> |
| 200                                        |               | 66.01 ± 6.95 <sup>aA</sup> | 69.11 ± 6.82 <sup>cA</sup> | 47.54 ± 4.05 <sup>aB</sup>  | 42.64 ± 5.19 <sup>bB</sup> |               | 19.55 ± 2.71 <sup>dA</sup> | 25.18 ± 2.86 <sup>bB</sup> | 21.27 ± 2.38 <sup>aA</sup> | 17.51 ± 1.05 <sup>aA</sup> |
| 250                                        |               | 52.55 ± 5.20 <sup>aA</sup> | 71.14 ± 6.06 <sup>cB</sup> | 50.96 ± 5.98 <sup>aA</sup>  | 42.26 ± 4.90 <sup>bC</sup> |               | 19.21 ± 2.21 <sup>dA</sup> | 30.82 ± 3.09 <sup>dB</sup> | 27.14 ± 2.77 <sup>bB</sup> | 14.65 ± 1.90 <sup>bC</sup> |
| 300                                        |               | 75.94 ± 6.03 <sup>bA</sup> | 40.55 ± 4.74 <sup>dB</sup> | 56.05 ± 6.21 <sup>aC</sup>  | 69.83 ± 6.12 <sup>cD</sup> |               | 31.61 ± 3.12 <sup>aA</sup> | 14.21 ± 1.16 <sup>eB</sup> | 27.05 ± 2.85 <sup>bA</sup> | 24.53 ± 2.49 <sup>cC</sup> |
| 350                                        |               | 76.06 ± 8.96 <sup>bA</sup> | 43.83 ± 4.56 <sup>dB</sup> | 64.47 ± 6.88 <sup>dC</sup>  | 43.00 ± 4.59 <sup>cB</sup> |               | 28.66 ± 3.46 <sup>aA</sup> | 15.42 ± 1.32 <sup>eB</sup> | 36.11 ± 3.14 <sup>dC</sup> | 21.19 ± 1.25 <sup>cD</sup> |
| 400                                        |               | 63.44 ± 6.43 <sup>aA</sup> | 48.40 ± 4.03 <sup>aB</sup> | 51.31 ± 5.58 <sup>aB</sup>  | 54.69 ± 5.86 <sup>dB</sup> |               | 29.05 ± 1.48 <sup>aA</sup> | 22.19 ± 1.31 <sup>aB</sup> | 22.15 ± 2.75 <sup>aB</sup> | 23.74 ± 2.47 <sup>cB</sup> |
| 450                                        |               | 65.60 ± 6.63 <sup>aA</sup> | 48.63 ± 4.63 <sup>aB</sup> | 46.28 ± 4.29 <sup>aB</sup>  | 49.41 ± 4.34 <sup>aB</sup> |               | 28.45 ± 3.07 <sup>aA</sup> | 21.83 ± 1.75 <sup>aB</sup> | 16.36 ± 1.91 <sup>cC</sup> | 25.06 ± 2.90 <sup>cD</sup> |
| 500                                        |               | 39.50 ± 4.25 <sup>cA</sup> | 63.06 ± 6.64 <sup>cB</sup> | 92.54 ± 8.49 <sup>cC</sup>  | 38.79 ± 3.77 <sup>dA</sup> |               | 18.46 ± 1.57 <sup>dA</sup> | 25.01 ± 2.80 <sup>bB</sup> | 29.37 ± 2.32 <sup>bC</sup> | 17.30 ± 1.71 <sup>bA</sup> |

Legend: EV: amniotic derived extracellular vesicle; CTR: control; VCL: curvilinear-line velocity; VSL: straight-line velocity. Different capital letters (A–D) in superscript indicate statistically significant differences (P < 0.05) between the time 0 and 4 hours incubation. Different lowercase letter (a–e) in superscript indicate statistically significant differences (P < 0.05) between different EV concentrations.

**Supplementary Table S2.** Sperm motility parameters evaluated by CASA System of sperm treated at different time with different concentration of AMSC-EVs, compared to CTR.

| EV concentration<br>(x10 <sup>6</sup> )/ml | VAP (μm/s)    |                            |                             |                            |                            | AHL (μm)    |                           |                           |                           |                           |
|--------------------------------------------|---------------|----------------------------|-----------------------------|----------------------------|----------------------------|-------------|---------------------------|---------------------------|---------------------------|---------------------------|
|                                            | 0h            | 1h                         | 2h                          | 3h                         | 4h                         | 0h          | 1h                        | 2h                        | 3h                        | 4h                        |
| CTR                                        | 53.85 ± 55.92 | 41.91 ± 4.08 <sup>aA</sup> | 33.26 ± 3.27 <sup>aA</sup>  | 31.20 ± 3.69 <sup>aA</sup> | 30.95 ± 3.12 <sup>aA</sup> | 4.35 ± 3.73 | 3.87 ± 0.72 <sup>aA</sup> | 3.70 ± 0.35 <sup>aA</sup> | 3.79 ± 0.43 <sup>aA</sup> | 3.62 ± 3.51 <sup>aA</sup> |
| 50                                         |               | 17.79 ± 1.90 <sup>bB</sup> | 36.07 ± 3.49 <sup>aAB</sup> | 33.26 ± 4.66 <sup>aA</sup> | 29.54 ± 3.26 <sup>aA</sup> |             | 3.74 ± 0.95 <sup>aA</sup> | 3.93 ± 0.68 <sup>aA</sup> | 2.84 ± 0.97 <sup>aA</sup> | 4.02 ± 2.83 <sup>aA</sup> |
| 100                                        |               | 33.05 ± 3.86 <sup>cC</sup> | 40.23 ± 4.40 <sup>aB</sup>  | 32.94 ± 3.46 <sup>aA</sup> | 29.45 ± 3.43 <sup>aA</sup> |             | 4.40 ± 0.48 <sup>aA</sup> | 4.56 ± 0.77 <sup>bA</sup> | 3.89 ± 0.94 <sup>aA</sup> | 3.96 ± 3.35 <sup>aA</sup> |
| 150                                        |               | 28.36 ± 1.96 <sup>dC</sup> | 40.18 ± 4.70 <sup>aB</sup>  | 37.92 ± 3.45 <sup>bA</sup> | 30.96 ± 3.52 <sup>aA</sup> |             | 4.59 ± 0.94 <sup>aA</sup> | 4.21 ± 0.72 <sup>bA</sup> | 3.53 ± 0.98 <sup>aA</sup> | 3.03 ± 4.08 <sup>a</sup>  |
| 200                                        |               | 28.50 ± 2.14 <sup>dC</sup> | 40.54 ± 4.38 <sup>aB</sup>  | 33.76 ± 3.72 <sup>aA</sup> | 29.21 ± 3.62 <sup>aA</sup> |             | 4.70 ± 0.27 <sup>aA</sup> | 4.72 ± 0.02 <sup>bA</sup> | 3.32 ± 0.83 <sup>aA</sup> | 3.76 ± 2.74 <sup>aA</sup> |
| 250                                        |               | 29.17 ± 2.05 <sup>dC</sup> | 48.61 ± 4.30 <sup>bC</sup>  | 35.44 ± 3.53 <sup>aA</sup> | 29.08 ± 3.40 <sup>aA</sup> |             | 3.16 ± 0.36 <sup>aA</sup> | 4.06 ± 0.44 <sup>bA</sup> | 3.41 ± 0.54 <sup>aA</sup> | 3.08 ± 3.84 <sup>aA</sup> |
| 300                                        |               | 43.81 ± 4.48 <sup>eA</sup> | 40.65 ± 4.65 <sup>aB</sup>  | 35.10 ± 4.24 <sup>aA</sup> | 30.55 ± 3.07 <sup>aA</sup> |             | 5.69 ± 0.83 <sup>bB</sup> | 3.34 ± 0.68 <sup>aA</sup> | 3.60 ± 0.24 <sup>aA</sup> | 3.07 ± 3.62 <sup>aA</sup> |
| 350                                        |               | 48.75 ± 4.01 <sup>eD</sup> | 40.95 ± 3.53 <sup>aB</sup>  | 35.06 ± 7.71 <sup>aA</sup> | 30.50 ± 3.72 <sup>aA</sup> |             | 3.75 ± 0.98 <sup>aA</sup> | 3.40 ± 0.36 <sup>aA</sup> | 2.95 ± 0.14 <sup>aB</sup> | 3.59 ± 2.61 <sup>aA</sup> |
| 400                                        |               | 39.98 ± 3.88 <sup>cA</sup> | 41.94 ± 3.79 <sup>aB</sup>  | 35.79 ± 3.69 <sup>aA</sup> | 30.10 ± 3.85 <sup>aA</sup> |             | 3.23 ± 0.14 <sup>aA</sup> | 3.60 ± 0.60 <sup>aA</sup> | 3.41 ± 0.56 <sup>aA</sup> | 3.30 ± 3.35 <sup>aA</sup> |
| 450                                        |               | 44.75 ± 4.83 <sup>eA</sup> | 36.32 ± 3.17 <sup>aB</sup>  | 35.75 ± 3.51 <sup>aA</sup> | 30.15 ± 3.26 <sup>aA</sup> |             | 3.84 ± 0.43 <sup>aA</sup> | 3.80 ± 0.80 <sup>aA</sup> | 3.21 ± 0.26 <sup>aA</sup> | 3.96 ± 2.62 <sup>aA</sup> |
| 500                                        |               | 64.07 ± 6.78 <sup>fE</sup> | 36.18 ± 3.88 <sup>aB</sup>  | 32.62 ± 2.94 <sup>aA</sup> | 30.71 ± 3.26 <sup>aA</sup> |             | 4.65 ± 0.02 <sup>aB</sup> | 3.65 ± 0.60 <sup>aA</sup> | 5.86 ± 1.02 <sup>bB</sup> | 3.50 ± 2.70 <sup>aA</sup> |

Legend: EV: amniotic derived extracellular vesicle; CTR: control; VAP: average path velocity; AHL: amplitude lateral head. Different capital letters (A,B) in superscript indicate statistically significant differences (P <0.05) between the time 0 and 4 hours incubation. Different lowercase letter (a,b) in superscript indicate statistically significant differences (P<0.05) between different EV concentrations.

**Supplementary Table S3.** Sperm motility parameters evaluated by CASA System of sperm treated at different time with different concentration of EVs, compared to CTR.

| EV concentration<br>(x10 <sup>6</sup> )/ml | LIN (%)       |                            |                             |                            |                            | STR         |                           |                           |                           |                           |
|--------------------------------------------|---------------|----------------------------|-----------------------------|----------------------------|----------------------------|-------------|---------------------------|---------------------------|---------------------------|---------------------------|
|                                            | 0h            | 1h                         | 2h                          | 3h                         | 4h                         | 0h          | 1h                        | 2h                        | 3h                        | 4h                        |
| CTR                                        | 44.58 ± 19.64 | 48.34 ± 3.01 <sup>aA</sup> | 48.95 ± 2.60 <sup>aA</sup>  | 47.01 ± 1.21 <sup>aA</sup> | 36.59 ± 1.20 <sup>aB</sup> | 0.75 ± 0.28 | 0.86 ± 0.10 <sup>aA</sup> | 0.84 ± 0.13 <sup>aB</sup> | 0.86 ± 0.13 <sup>aA</sup> | 0.78 ± 0.11 <sup>aC</sup> |
| 50                                         |               | 44.82 ± 3.87 <sup>bA</sup> | 46.46 ± 2.08 <sup>aAB</sup> | 48.33 ± 1.61 <sup>aB</sup> | 38.60 ± 2.43 <sup>aC</sup> |             | 0.80 ± 0.14 <sup>bA</sup> | 0.87 ± 0.11 <sup>bB</sup> | 0.92 ± 0.19 <sup>bC</sup> | 0.77 ± 0.11 <sup>aD</sup> |
| 100                                        |               | 49.26 ± 4.58 <sup>aA</sup> | 46.54 ± 4.14 <sup>aA</sup>  | 49.29 ± 2.22 <sup>aA</sup> | 46.81 ± 1.91 <sup>bA</sup> |             | 0.84 ± 0.11 <sup>cA</sup> | 0.82 ± 0.12 <sup>aB</sup> | 0.83 ± 0.11 <sup>cB</sup> | 0.90 ± 0.10 <sup>bC</sup> |
| 150                                        |               | 48.03 ± 4.77 <sup>aA</sup> | 46.70 ± 4.96 <sup>aA</sup>  | 48.80 ± 2.34 <sup>aA</sup> | 48.12 ± 2.21 <sup>bA</sup> |             | 0.75 ± 0.12 <sup>dA</sup> | 0.75 ± 0.19 <sup>cA</sup> | 0.66 ± 0.19 <sup>dB</sup> | 0.80 ± 0.10 <sup>cC</sup> |
| 200                                        |               | 34.20 ± 3.67 <sup>cA</sup> | 47.37 ± 4.94 <sup>aB</sup>  | 51.10 ± 2.64 <sup>bb</sup> | 46.24 ± 1.55 <sup>bb</sup> |             | 0.81 ± 0.13 <sup>bA</sup> | 0.82 ± 0.10 <sup>aA</sup> | 0.81 ± 0.16 <sup>bA</sup> | 0.84 ± 0.13 <sup>dB</sup> |
| 250                                        |               | 36.90 ± 2.90 <sup>cA</sup> | 46.12 ± 4.93 <sup>aB</sup>  | 50.38 ± 2.42 <sup>bb</sup> | 46.00 ± 1.68 <sup>bb</sup> |             | 0.78 ± 0.16 <sup>dA</sup> | 0.78 ± 0.15 <sup>cA</sup> | 0.86 ± 0.11 <sup>eB</sup> | 0.77 ± 0.14 <sup>aC</sup> |
| 300                                        |               | 38.47 ± 1.41 <sup>cA</sup> | 46.84 ± 3.34 <sup>aB</sup>  | 50.85 ± 1.47 <sup>bC</sup> | 54.29 ± 2.30 <sup>cD</sup> |             | 0.79 ± 0.18 <sup>dA</sup> | 0.83 ± 0.11 <sup>aB</sup> | 0.86 ± 0.10 <sup>eB</sup> | 0.67 ± 0.11 <sup>cC</sup> |
| 350                                        |               | 56.83 ± 2.17 <sup>dA</sup> | 51.36 ± 4.36 <sup>bb</sup>  | 64.25 ± 2.16 <sup>cC</sup> | 52.45 ± 2.41 <sup>cb</sup> |             | 0.81 ± 0.16 <sup>bA</sup> | 0.82 ± 0.16 <sup>aA</sup> | 0.88 ± 0.19 <sup>eB</sup> | 0.82 ± 0.18 <sup>dA</sup> |
| 400                                        |               | 56.75 ± 2.75 <sup>dA</sup> | 59.91 ± 2.35 <sup>cAB</sup> | 54.49 ± 1.14 <sup>dB</sup> | 54.37 ± 1.16 <sup>cB</sup> |             | 0.87 ± 0.11 <sup>aA</sup> | 0.87 ± 0.11 <sup>dB</sup> | 0.85 ± 0.12 <sup>aC</sup> | 0.88 ± 0.18 <sup>bb</sup> |
| 450                                        |               | 50.32 ± 2.00 <sup>eA</sup> | 52.68 ± 2.52 <sup>bA</sup>  | 41.07 ± 2.87 <sup>aB</sup> | 47.39 ± 2.50 <sup>bA</sup> |             | 0.83 ± 0.12 <sup>bA</sup> | 0.79 ± 0.19 <sup>cB</sup> | 0.82 ± 0.15 <sup>bA</sup> | 0.81 ± 0.15 <sup>cA</sup> |
| 500                                        |               | 44.28 ± 2.58 <sup>iA</sup> | 49.13 ± 1.72 <sup>aB</sup>  | 37.09 ± 1.33 <sup>iC</sup> | 48.82 ± 1.56 <sup>bb</sup> |             | 0.82 ± 0.11 <sup>bA</sup> | 0.82 ± 0.11 <sup>aA</sup> | 0.72 ± 0.17 <sup>iB</sup> | 0.89 ± 0.18 <sup>bC</sup> |

Legend: EV: amniotic derived extracellular vesicle; CTR: control; LIN: linearity; STR: straightness. Different capital letters (A,B) in superscript indicate statistically significant differences (P <0.05) between the time 0 and 4 hours incubation. Different lowercase letter (a,b) in superscript indicate statistically significant differences (P<0.05) between different EV concentrations
